# Supplementary material for: Gold and gold–palladium alloy nanoparticles on heterostructured TiO2nanobelts as plasmonic photocatalysts for benzyl alcohol oxidation
Source: Royal Society of Chemistry journal article supplement (doi:10.1039/c4nr05905k), 2014-11-03
Supplement: c4nr05905k1.pdf [file c4nr05905k1.pdf]

# Gold and gold-palladium alloy nanoparticles on heterostructured TiO<sub>2</sub> nanobelts as plasmonic photocatalysts for benzyl alcohol oxidation

Tongtong Jiang<sup>a</sup>, Chuancheng Jia<sup>b</sup>, Lanchun Zhang<sup>a</sup>, Shuren He<sup>a</sup>, Yuanhua Sang<sup>c</sup>,  
Haidong Li<sup>c</sup>, Yanqing Li<sup>c</sup>, Xiaohong Xu<sup>\*a</sup> and Hong Liu<sup>\*c</sup>

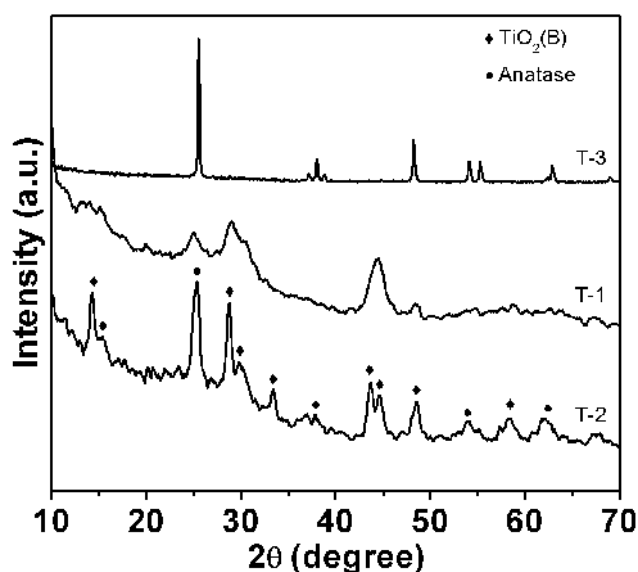

Fig. S1 XRD patterns of TiO<sub>2</sub> nanobelts.

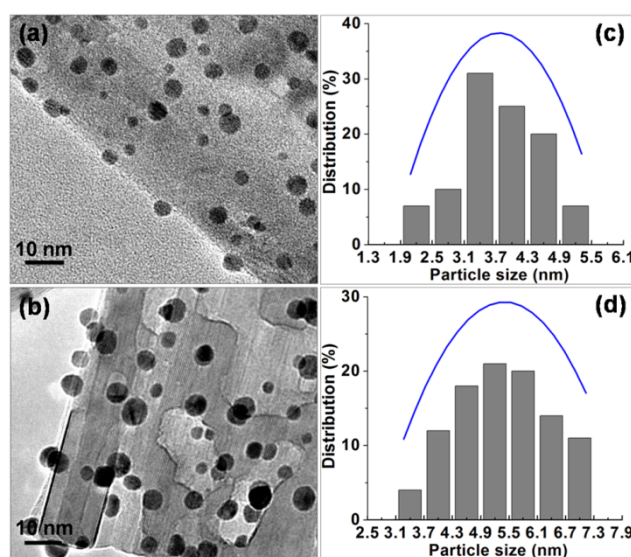

Fig. S2 Representative TEM images of (a) Au<sub>3.5</sub>/T-2 and (b) Au<sub>4.5</sub>/T-2, and the corresponding particle size distributions of (c) Au<sub>3.5</sub>/T-2 and (d) Au<sub>4.5</sub>/T-2.

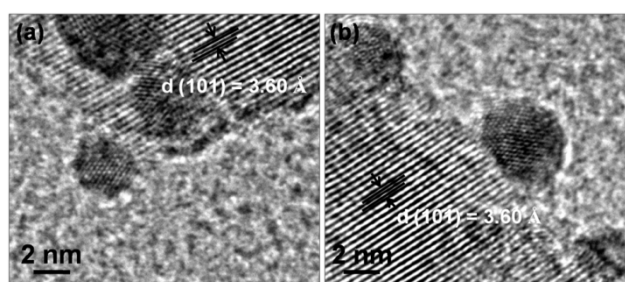

**Fig. S3** Representative HR-TEM images of Au/T-2 nanostructures.

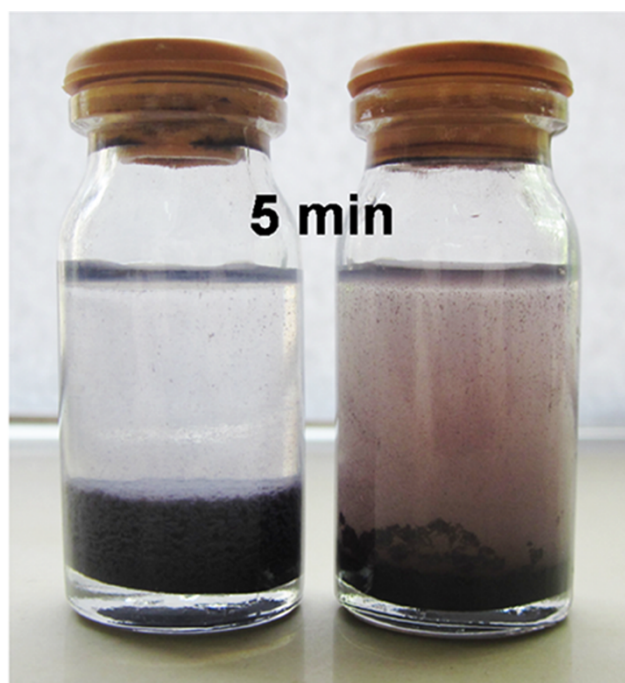

**Fig. S4** Sedimentation test of Au<sub>1</sub>/T-2 and Au<sub>1</sub>/P25.

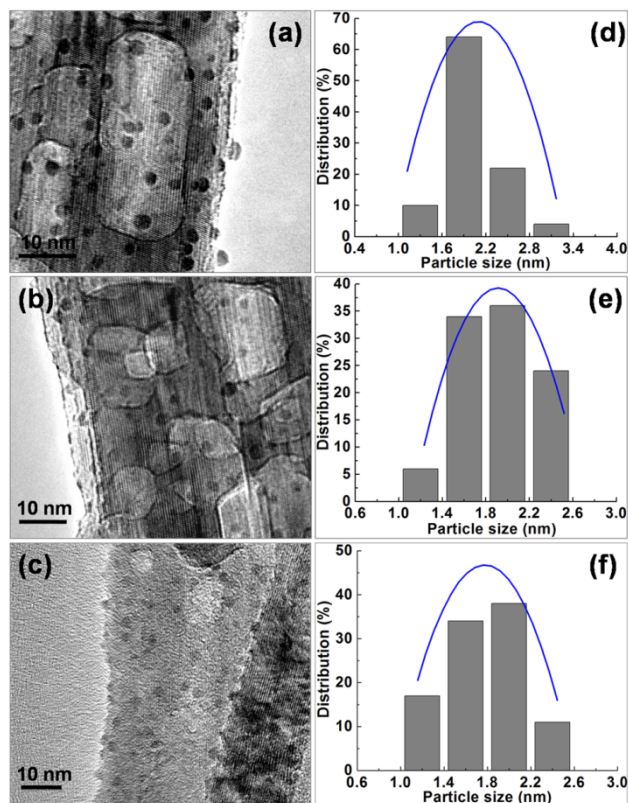

**Fig. S5** Representative TEM images of (a)  $\text{Au}_{0.5}\text{Pd}_{0.5}/\text{T-2}$ , (b)  $\text{Au}_{0.25}\text{Pd}_{0.75}/\text{T-2}$  and (c)  $\text{Pd}_1/\text{T-2}$ , and the corresponding particle size distributions of (d)  $\text{Au}_{0.5}\text{Pd}_{0.5}/\text{T-2}$ , (e)  $\text{Au}_{0.25}\text{Pd}_{0.75}/\text{T-2}$  and (f)  $\text{Pd}_1/\text{T-2}$ .

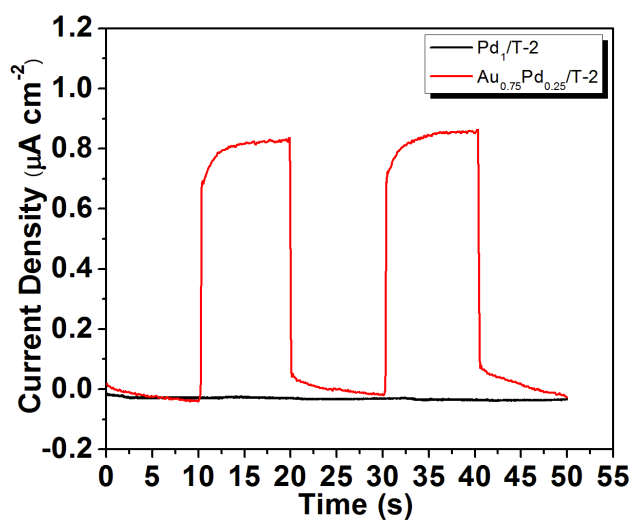

**Fig. S6** The photocurrent responses of  $\text{Au}_{0.75}\text{Pd}_{0.25}/\text{T-2}$  and  $\text{Pd}_1/\text{T-2}$  under visible light irradiation.
